# Supplementary material
Source: PubMed Central journal article supplement (PMC4751790)
Supplement: JB.00739-15_zjb999093875so1.pdf [file JB.00739-15_zjb999093875so1.pdf]

**Supplemental Table 1: Bacterial strains and plasmids used in this study.**

| Designation                  | Genotype or description                                                                                                                                                                              | Reference or Source |
|------------------------------|------------------------------------------------------------------------------------------------------------------------------------------------------------------------------------------------------|---------------------|
| <i>P. aeruginosa</i> strains |                                                                                                                                                                                                      |                     |
| MJ101                        | PA14 wild type                                                                                                                                                                                       | (50)                |
| MJ285                        | $\Delta gbdR$ in MJ285                                                                                                                                                                               | (7)                 |
| GGW039                       | <i>soxB</i> '-lacZYA-'soxG in MJ285                                                                                                                                                                  | This study          |
| GGW034                       | $\Delta souR$ in MJ101                                                                                                                                                                               | This study          |
| GGW036                       | $\Delta souR$ in MJ285                                                                                                                                                                               | This study          |
| GGW076                       | $\Delta gfnR$ in MJ101                                                                                                                                                                               | This study          |
| GGW078                       | $\Delta gfnR$ in MJ285                                                                                                                                                                               | This study          |
| <i>E. coli</i> strains       |                                                                                                                                                                                                      |                     |
| NEB5 $\alpha$                | <i>fhuA2</i> $\Delta$ ( <i>argF-lacZ</i> )U169 <i>phoA</i><br><i>glnV44</i> $\Phi$ 80 $\Delta$ ( <i>lacZ</i> )M15 <i>gyrA96</i><br><i>recA1</i> <i>relA1</i> <i>endA1</i> <i>thi-1</i> <i>hsdR17</i> | NEB                 |
| S17-1 $\lambda$ pir          | <i>thi pro hsdR</i> - <i>hsdM</i> <sup>+</sup> $\Delta$ <i>recA</i><br>RP4-2::TcMu-Km::Tn7                                                                                                           | (51)                |
| T7 Express                   | See manufacturer                                                                                                                                                                                     | NEB                 |
| GGW040                       | pGW005 in S17-1 $\lambda$ pir                                                                                                                                                                        | This study          |
| GGW031                       | pGW008 in S17-1 $\lambda$ pir                                                                                                                                                                        | This study          |
| GGW064                       | pGW024 in S17-1 $\lambda$ pir                                                                                                                                                                        | This study          |
| MJ500                        | pBT20 in SM10 $\lambda$ pir                                                                                                                                                                          | (13, 30)            |
| GGW047                       | pGW015 in T7 Express                                                                                                                                                                                 | This study          |
| Plasmids                     |                                                                                                                                                                                                      |                     |
| pMQ30                        | suicide vector, Gm <sup>R</sup> , <i>sacB</i>                                                                                                                                                        | (26)                |
| pMQ80                        | High copy <i>Pseudomonas</i> vector, Gm <sup>R</sup>                                                                                                                                                 | (26)                |
| pUC18-mini-Tn7T-Gm           | <i>attTn7</i> integration vector, Gm <sup>R</sup>                                                                                                                                                    | (28)                |
| pTNS2                        | carrying the <i>attTn7</i> transposase                                                                                                                                                               | (29)                |
| pMW5                         | <i>lacZYA</i> reporter plasmid Gm <sup>R</sup>                                                                                                                                                       | (7)                 |
| pMALc2X                      | MBP-fusion vector, Ap <sup>R</sup>                                                                                                                                                                   | NEB                 |
| pKH10                        | MBP-GbdR expression vector                                                                                                                                                                           | (22)                |
| pGW005                       | <i>soxB</i> '-lacZYA-'soxG in pMQ30                                                                                                                                                                  | This study          |
| pGW007                       | <i>souR</i> complementation in pMQ80                                                                                                                                                                 | This study          |
| pGW008                       | <i>souR</i> (PA14_9770) in pMQ30                                                                                                                                                                     | This study          |
| pGW023                       | <i>gfnR</i> (PA14_17380) in pMQ30                                                                                                                                                                    | This study          |
| pGW024                       | <i>gfnR</i> (PA14_17380) in pUC18-mini-Tn7T-Gm                                                                                                                                                       | This study          |
| pGW011                       | P <sub>glyA1</sub> -210 to +1 in pMW5                                                                                                                                                                | This study          |
| pGW012                       | P <sub>glyA1</sub> -158 to +1 in pMW5                                                                                                                                                                | This study          |
| pGW013                       | P <sub>glyA1</sub> -104 to +1 in pMW5                                                                                                                                                                | This study          |
| pGW014                       | P <sub>glyA1</sub> -67 to +1 in pMW5                                                                                                                                                                 | This study          |
| pGW015                       | <i>souR</i> (PA14_17380) in pMALc2X                                                                                                                                                                  | This study          |

## Supplementary Table 2. Primer sequences.

|                         |                                                             |
|-------------------------|-------------------------------------------------------------|
| SoxKO-F1                | aagcttCTACCGGGCTGATCGACTAC                                  |
| SoxKO-R1                | AAGTACGAAGGCGACTCGACCATGGTGGTGGATGCTCCTGAACTGTTG            |
| SoxKO-F2                | CCATGGTCGAGTCGCCTTCGTACTTACTTCTGGCTCTGGTTGCAG               |
| SoxKO-R2                | ggtaccTTGCACTGGAAAGTCGTCTG                                  |
| PA14_9770 KO F1         | CCG GGA GGT GGG TTA CTT TC                                  |
| PA14_9770 KO R1         | CTT CAG ACT CCG ACT GCC GCG CGC TGA AAC GCC TTC TTT CCA T   |
| PA14_9770 KO F2         | CGC GGC AGT CGG AGT CTG AAG GCA ACG TCC GCT CGA CGA AAT G   |
| PA14_9770 KO R2         | CCG CCG ACA GCG TAT AAG GA                                  |
| PA14_9770 Rescue F      | GCT CGG TAC CCA TGG AAA GAA GGC GTT TCA GCG CCG             |
| PA14_9770 Rescue R      | GCC AAG CTT TCA TTT CGT CGA GCG GAC GTT GCC                 |
| PglyA1_F1               | TGT ATT AAG CTT GGT GTT CTC GCA AGA CGA AGA GC              |
| PglyA1_50bp_del_F2      | TGT ATT AAG CTT CCG CAT CGG TTG CCG AAT CCC AC              |
| PglyA1_100bp_del_F3     | TGA TAT TAA GCT TGC ATA GGC ATC TGG GCC GGC AGG             |
| PglyA1_150bp_del_F4     | TCG CTA TTA AGC TTC GCT GGC AAA GGG ACC GCG TGT             |
| PglyA1_R1               | ATA TCA AGG TAC CAT TCC GGC GCG GTT CCG GCG C               |
| souR_MPB_F (Ecor1)      | TTT CAG AAT TCG AAA GAA GGC GTT TCA GCG CCG C               |
| souR_MPB_R (BamHI)      | CTA GAG GAT CCT CAT TTC GTC GAG CGG ACG TTG CCG             |
| PA3630KO_F1             | CAT TCG GGC CCA TCC AGA AGA T                               |
| PA3630KO_R1             | CGC GCG GCC TTC GCA GGC CTG CAA CTG GTG GAC TAT CTC AAG GAA |
| PA3630KO_F2             | AGG CCT GCG AAG GCC GCG CGG AGG AAA CGC CCA TGC GTT CG      |
| PA3630KO_R2             | TTG TCG TAG TCC TTC GGA TTG ATG                             |
| PA3630 RescueF KpnI     | CATGGTACCGCGAAGGCGACGGCGGCACGGG                             |
| PA3630 Rescue R HindIII | CATAAGCTT G CGA CCA GAA CCT CAC CAG GTA G                   |
| PA3630 KO screen F      | GGA CAG ACC TTC CTG CAA CA                                  |
| PA3630 KO screen R      | CAG AGG TAC ATG ACG CGT GG                                  |
| PA2762_F1               | GGCAAGTGGGAGGTGAACTA                                        |
| PA2762_R1               | AAGTACTTGCGCACCGTCTC                                        |
| rplU_F1                 | GCAGCACAAAGTCACCGAAGG                                       |
| rplU_R1                 | CCGTGGGAAACCACTTCAGC                                        |
| sdaB_F1                 | CATGGAATGGGTCAACCTGT                                        |
| sdaB_R1                 | AGATCGAGGCGTTCTTCTTG                                        |
| soxA_F1                 | GTTCTCAACCGGGTCTACA                                         |
| soxA_R1                 | ATTCGGTCTGGTGGTACAGC                                        |
| PA3630_F1               | GTG CGG CAA GTG CAA ATT CT                                  |
| PA3630_R1               | GGG GCA TCC TTG GGA ATC TT                                  |
| PA3629-prom-5'-biotin   | 5'biotin-CGC TCT TCC AGG CGG GCG ACC TGG C                  |
| PA3629-prom-3'          | ATA GGT ACC GAT GGA AGC CGG CGG GCC G                       |
| PA2762-prom-5'-biotin   | 5'biotin-CAGGAAGGCAGTGGATGAAT                               |
| PA2762-prom-3'          | CCTTTGCCTGTGGTGGAC                                          |
| glyA1-prom-5'-biotin    | 5'biotin-GTGTTCTCGCAGGACGAAG                                |
| glyA1-prom-3'           | CTTTGCCAGCGATGGTATG                                         |
| cbcX-prom-5'-biotin     | 5'biotin-GAACTCCTCTGCAGGGTAAGG                              |
| cbcX-prom-3'            | CCGGCAAAGACCACTATGAT                                        |
| PA1999_prom_R1_KpnI     | GGATggtaccCTCTTCCGGCTCTTGTGATT                              |
| PA1999_F_biot           | GAGGCTTTTCTCCAGGCTCT                                        |
| TnM5 amp F              | TAC AGT TTA CGA ACC GAA CAG GC                              |
| SouR tnm R              | GAA GAA CAG GCG AAC GCA TC                                  |
| PA4183 TnM R            | TTC TTG GTG CGC TTT GGT TG                                  |
| GbdR TnM R              | TGG CAT AGC CCC CAA TTT GT                                  |
| sdaB TnM R              | AGG CCT GCA GAT GAT GTT GG                                  |
| PA2762 TnM R            | CTC CCA GCG TTC GTA GTT CA                                  |
| OpdP TnM R              | TTG GGA ATG CGG AAG GTG AA                                  |
| soxA TnM R              | GTG GTG GTT CAT CCA GTC GT                                  |

|                      |                                      |
|----------------------|--------------------------------------|
| GfnR TnM R           | GGA CAG ACC TTC CTG CAA CA           |
| adhC TnM R           | TCT CGA CAT AGC TCG GCA AC           |
| dhcA Tnm R           | GGA CTC GAC AAG CGA GTA GG           |
| Rnd1 TnM20           | TATAATGTGTGGAATTGTGAGCGG             |
| Rnd1 PA Arb primer 2 | GGCCACGCGTCGACTAGTACNNNNNNNNNNNACGCC |
| Rnd2 TnM20           | ACAGGAAACAGGACTCTAGAGG               |
| Rnd2 Arb primer      | GGCCACGCGTCGACTAGTAC                 |
| BT20TnMSeq           | CACCCAGCTTTCTTGACAC                  |

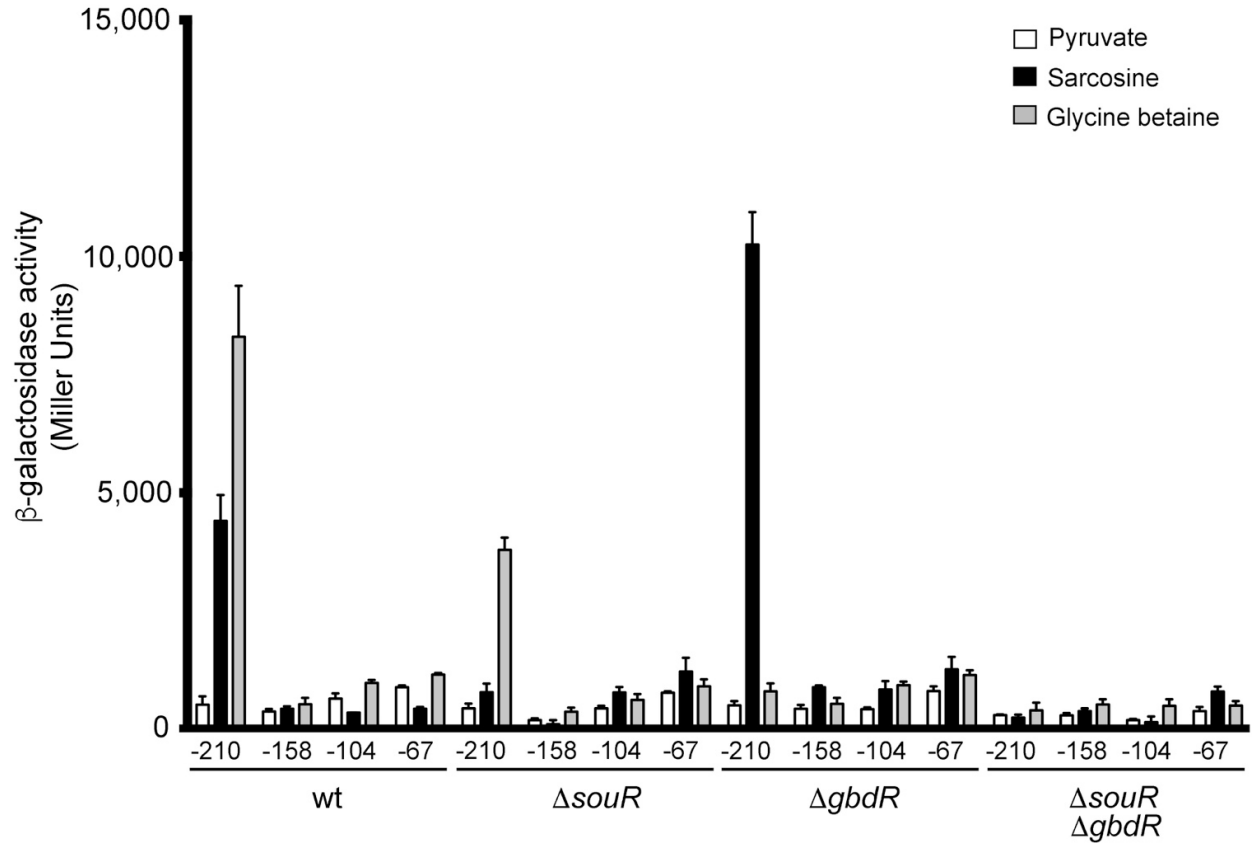

**Supplementary Figure 1.**  $P_{glyA1}$  promoter mapping of sarcosine or glycine betaine induced SouR and GbdR-dependent induction. Results from  $\beta$ -galactosidase assay of the four promoter truncation constructs (noted as bases upstream of the translational start site) in each of the four strains listed below the x-axis. The data shown are representative of three biological experiments and error bars represent standard deviation.
